# Supplementary material
Source: publisher figshare collection journal article supplement (https://acs.figshare.com/ndownloader/files/18680621)
Supplement: Supplementary file 1 [file 18680621]

# Highly Efficient Multigram Synthesis of Dibenzazacyclooctyne (DBCO) Without Chromatography

Stuart A. McNelles, Julia L. Pantaleo, Alex Adronov

Department of Chemistry & Chemical Biology, McMaster University, 1280 Main Street West,  
Hamilton, Ontario, Canada, L8S 4M1

## Supporting Information

$^1\text{H}$  NMR spectra and HPLC traces for the products synthesized.

### $^1\text{H}$ NMR Spectra

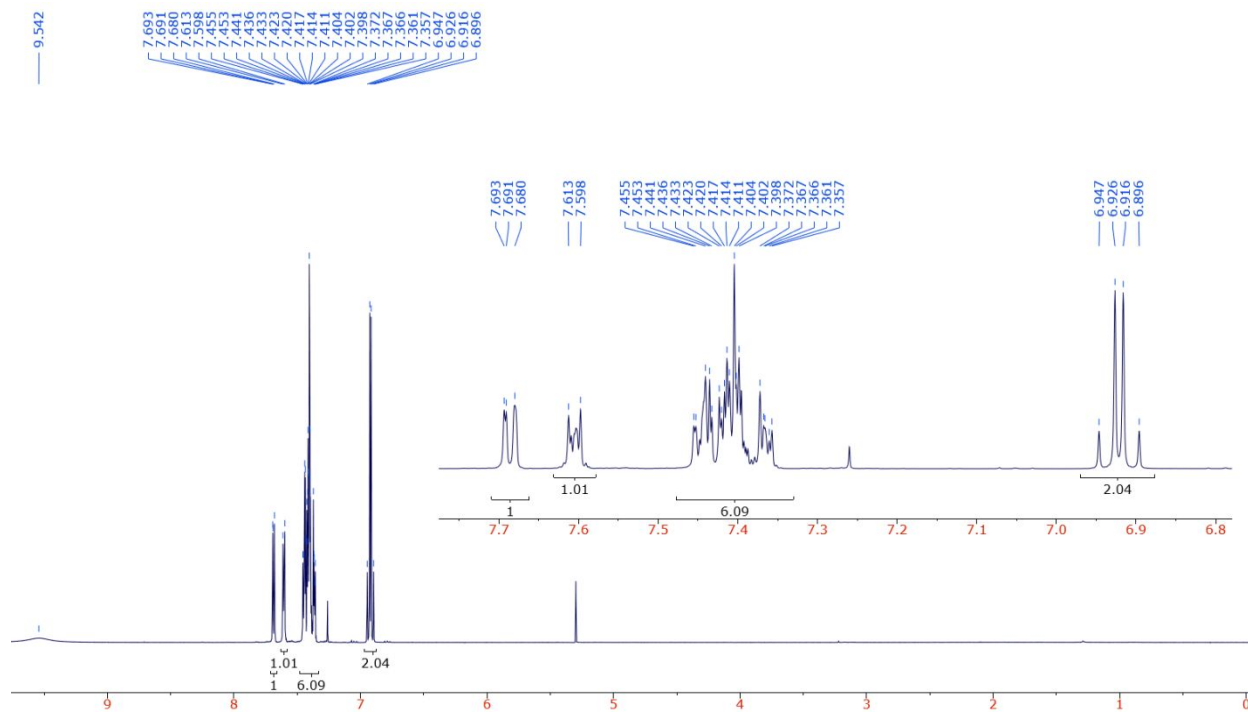

**Figure S1.**  $^1\text{H}$  NMR spectrum of Compound 2 in  $\text{CDCl}_3$

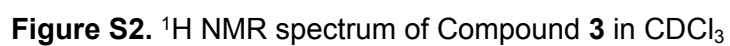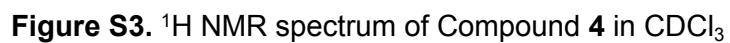

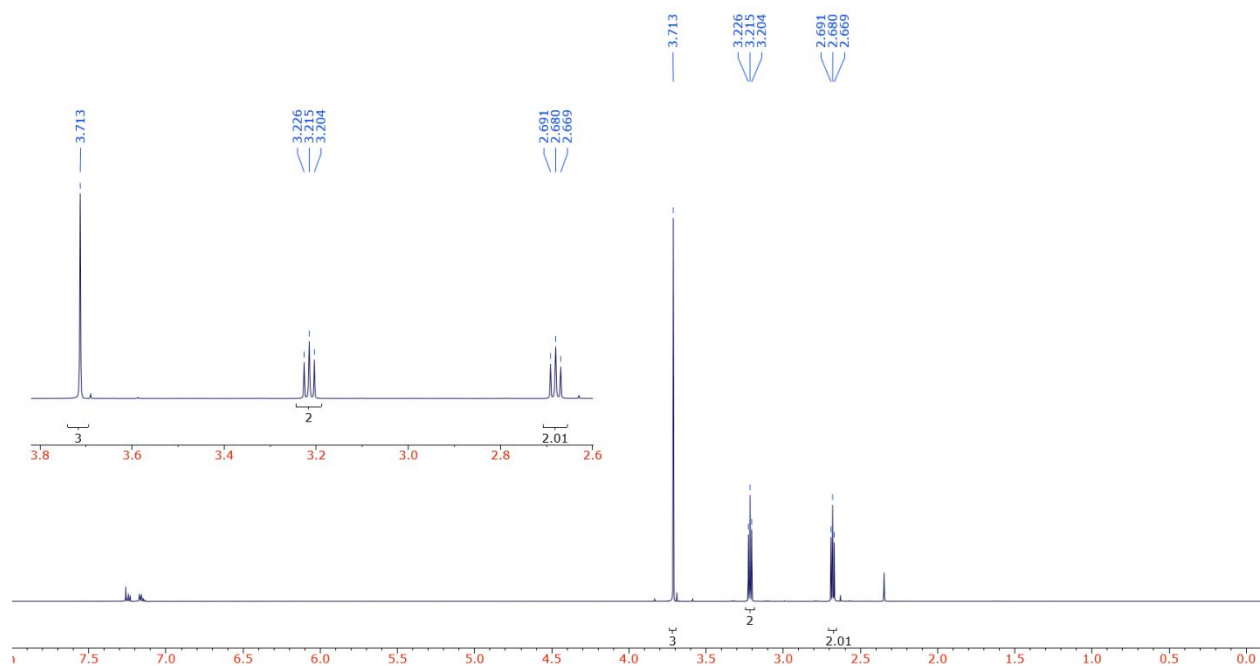

**Figure S4.** <sup>1</sup>H NMR spectrum of Compound **5** in CDCl<sub>3</sub>

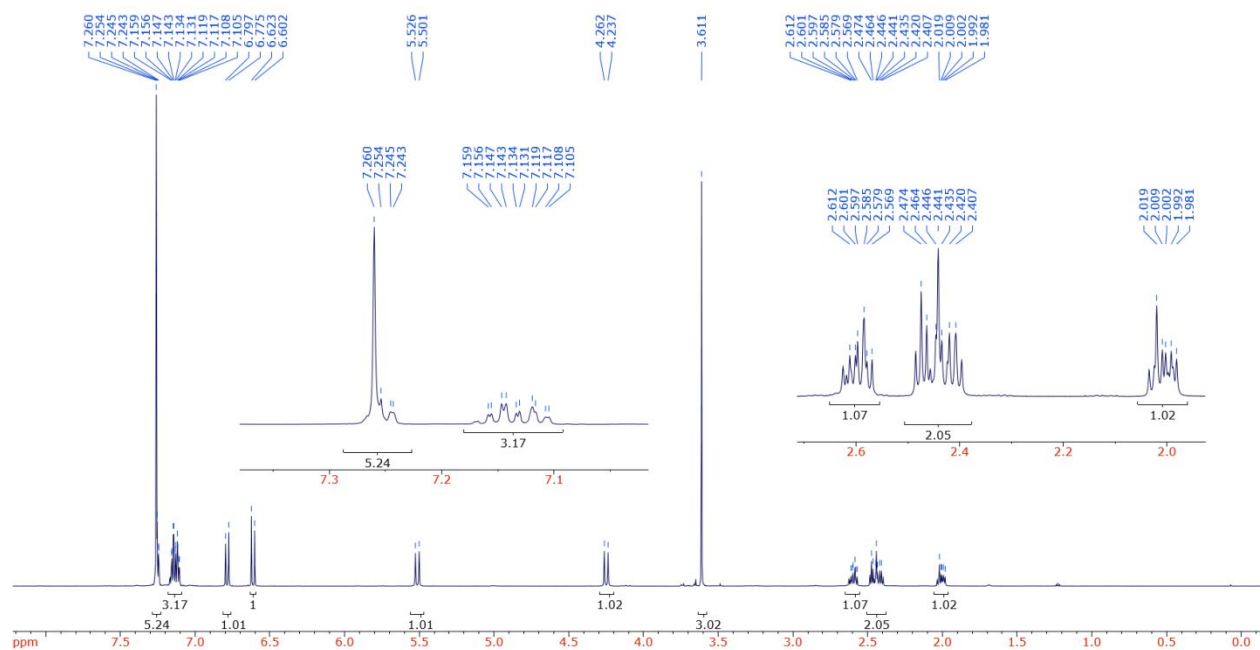

**Figure S5.** <sup>1</sup>H NMR spectrum of Compound **6** in CDCl<sub>3</sub>

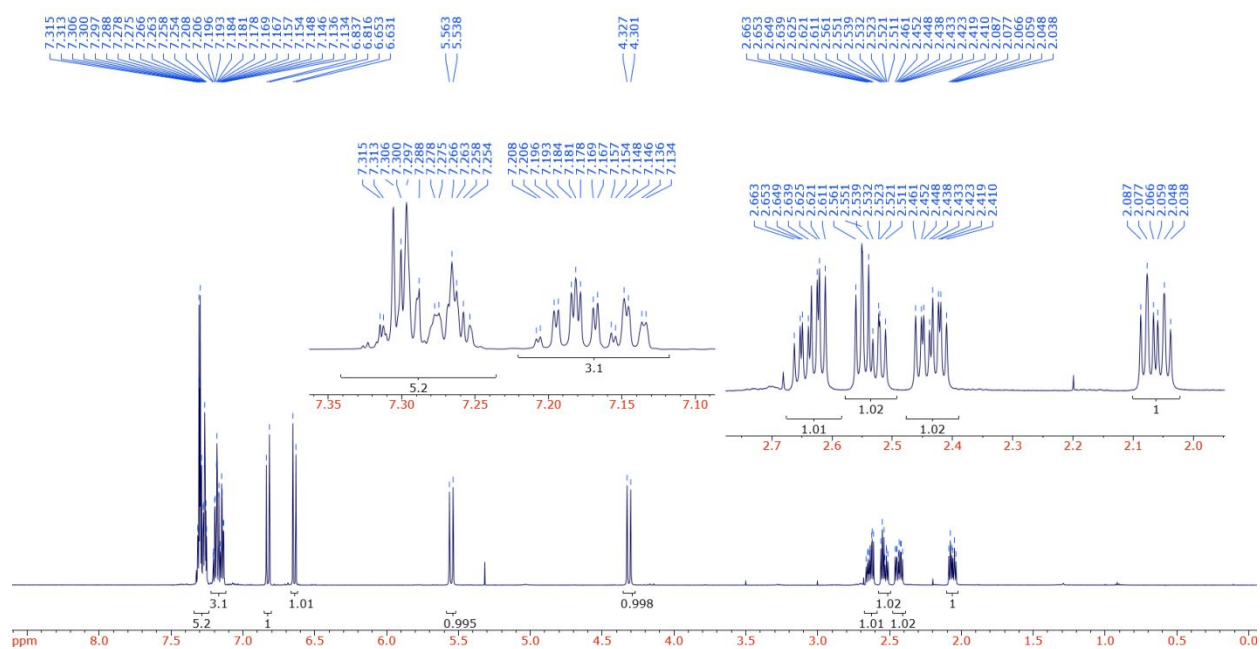

**Figure S6.**  $^1\text{H}$  NMR spectrum of Compound **7** in  $\text{CDCl}_3$

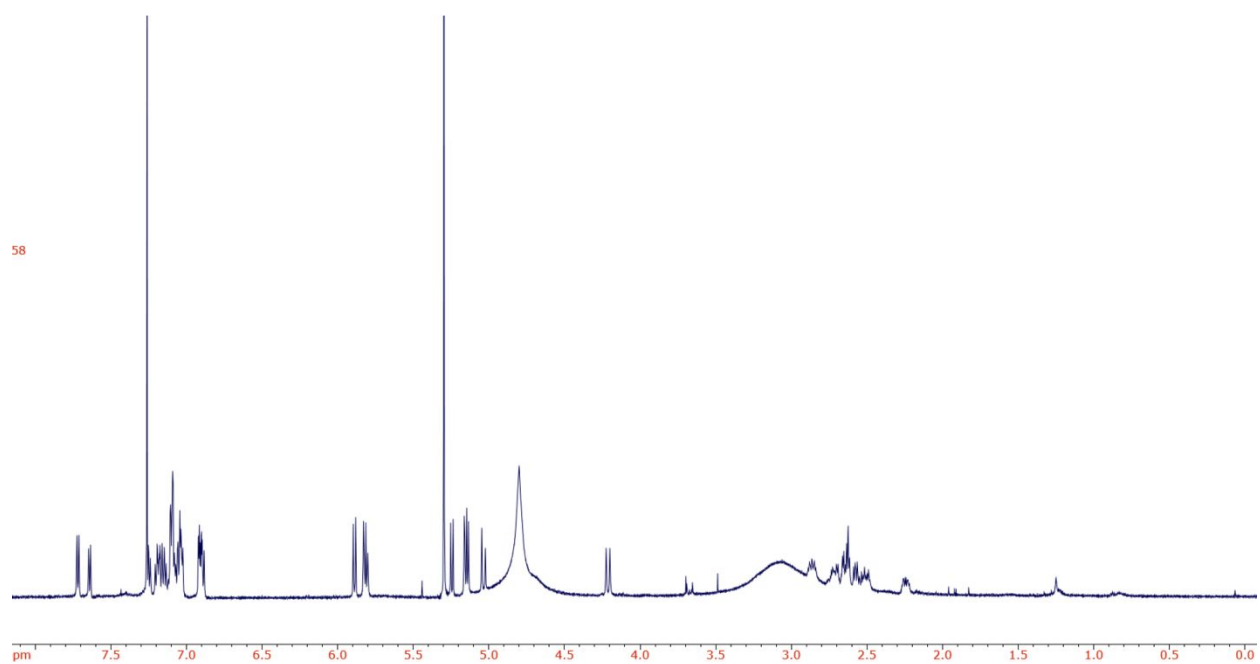

**Figure S7.**  $^1\text{H}$  NMR spectrum of Compound **8** in  $\text{CDCl}_3$  (crude)

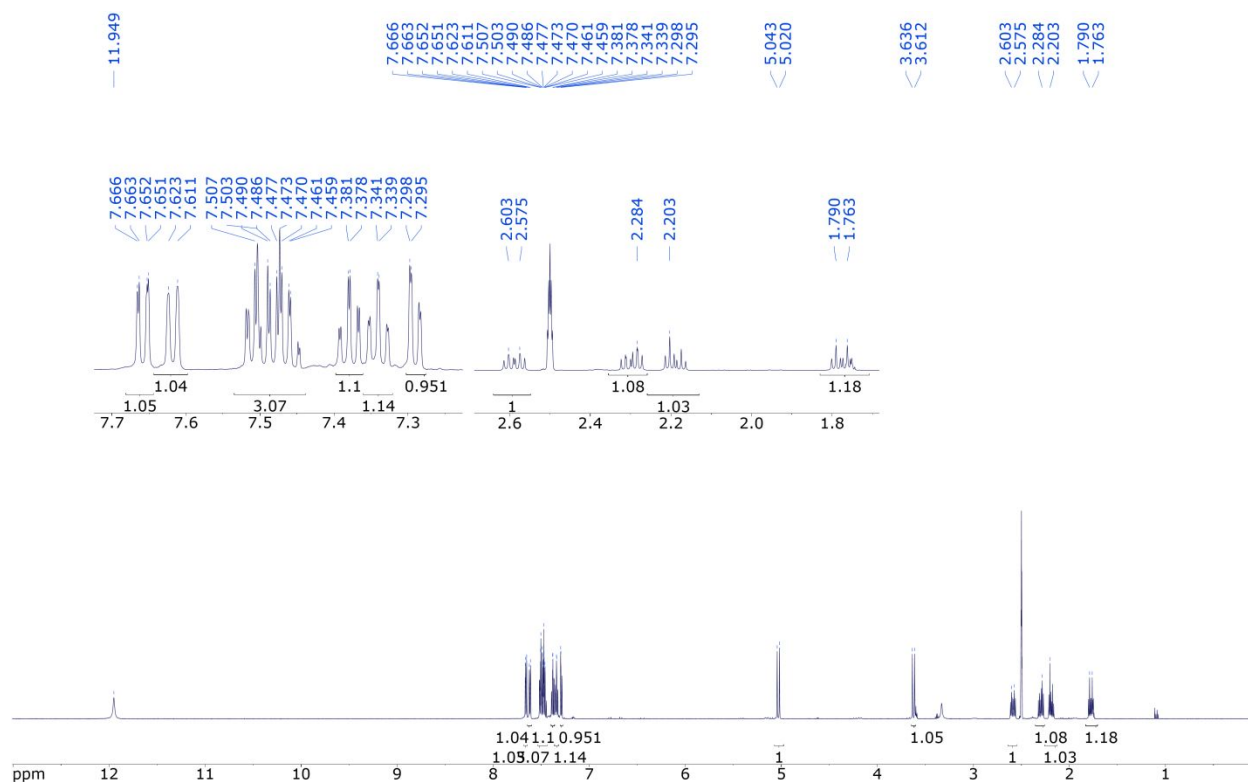

**Figure S8.**  $^1\text{H}$  NMR spectrum of Compound **9** in  $\text{DMSO}-d_6$

## HPLC Traces

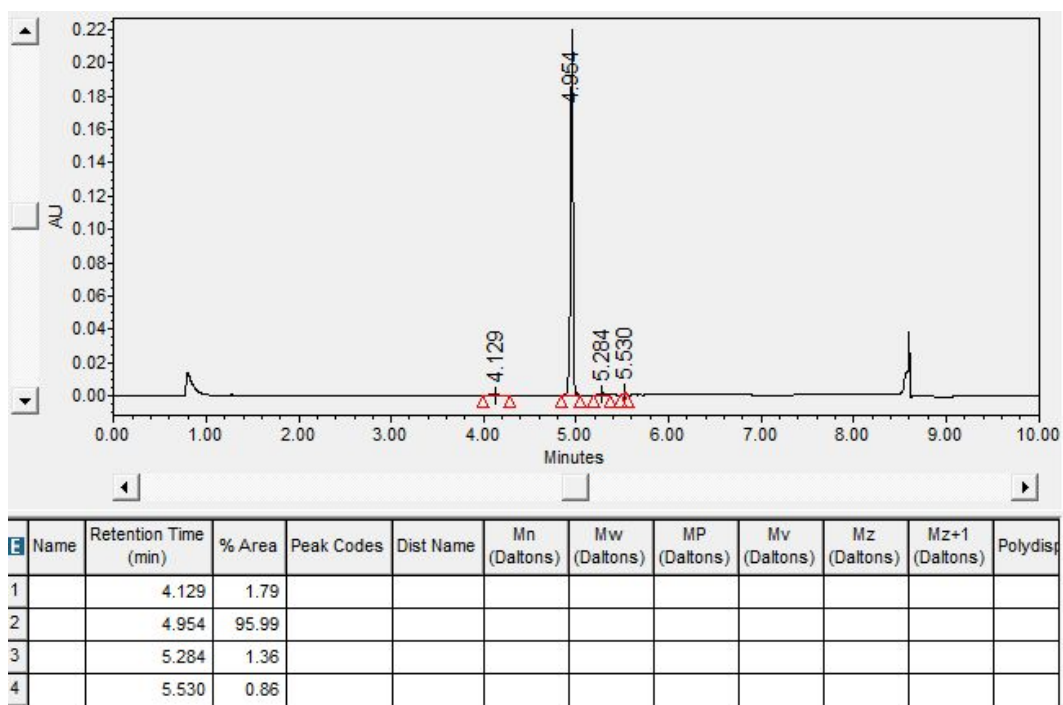

**Figure S9.** HPLC Trace of Compound **2** collected using HPLC method **1**

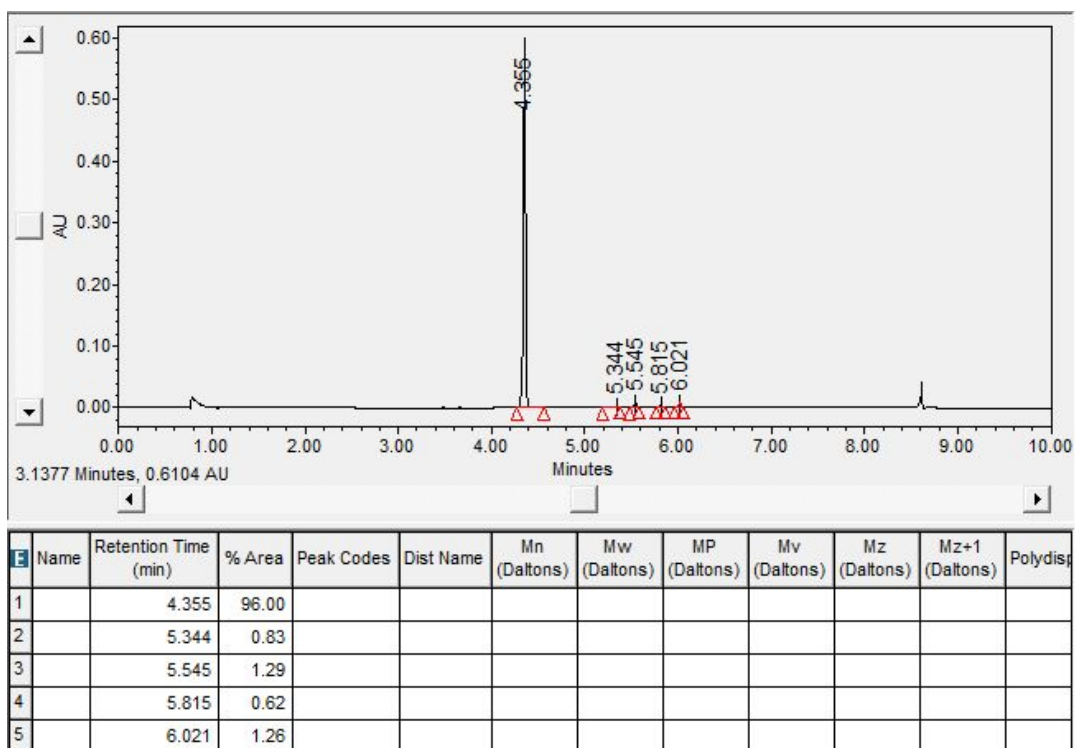

**Figure S10.** HPLC Trace of Compound **3** collected using HPLC method **1**

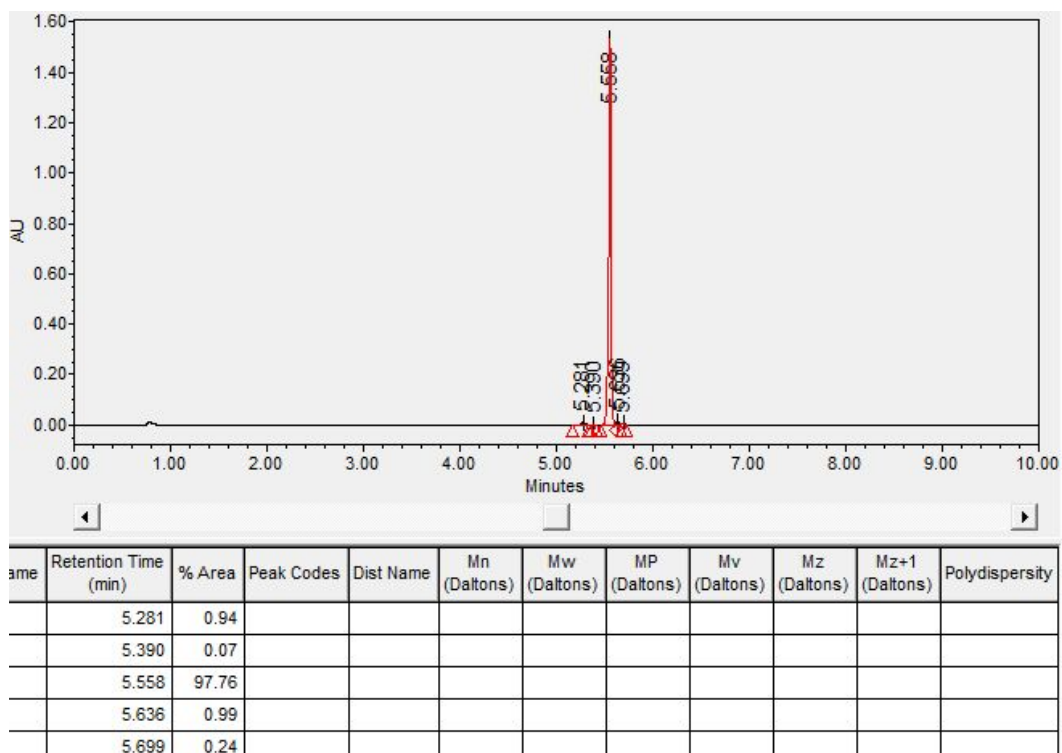

**Figure S11.** HPLC Trace of Compound **4** collected using HPLC method **1**

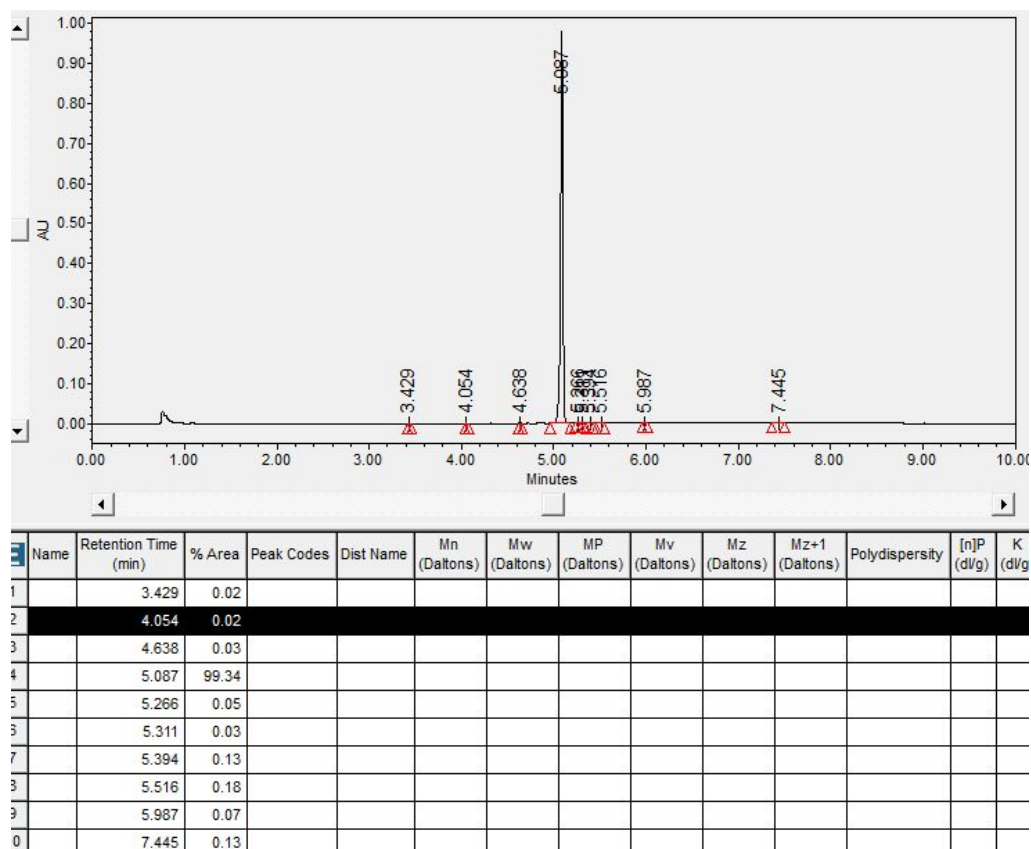

**Figure S12.** HPLC Trace of Compound **6** collected using HPLC method 1

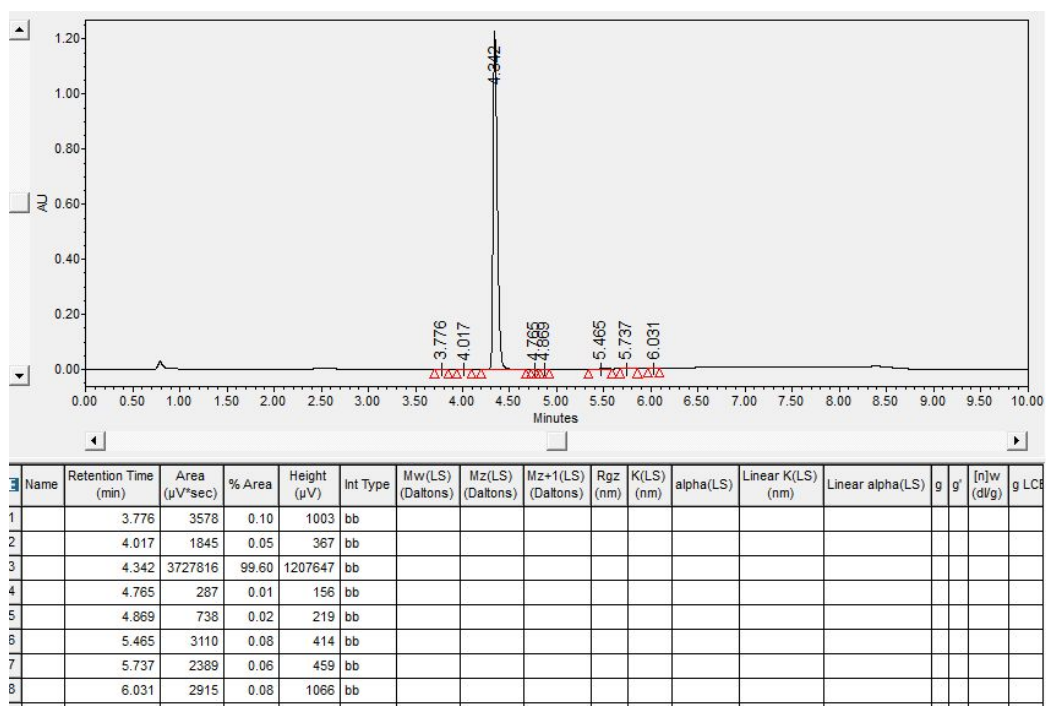

**Figure S13.** HPLC Trace of Compound **7** collected using HPLC method 1



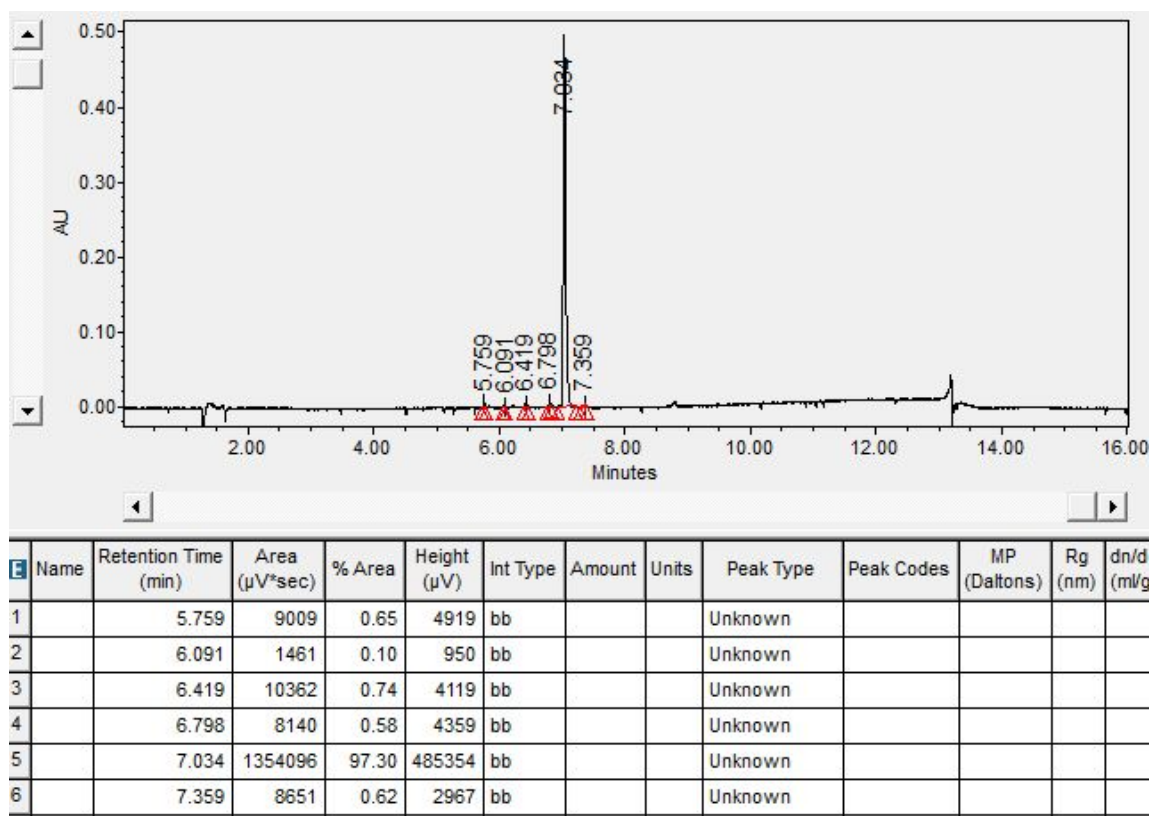

**Figure S14.** HPLC Trace of Compound **9** collected using HPLC method **2**
